# Supplementary material
Source: PubMed Central journal article supplement (PMC6478565)
Supplement: NIHMS1017497-supplement-ESI.pdf [file NIHMS1017497-supplement-ESI.pdf]

## SUPPLEMENTARY INFORMATION

*for*

### **The efficiency of cytosolic drug delivery using pH-responsive endosomolytic polymers does not correlate with activation of the NLRP3 inflammasome**

Jessalyn J. Baljon, Aamina Dandy, Lihong Wang-Bishop, Mohamed Wehbe, Max E. Jacobson and John T. Wilson

**Supporting Data:**

**Table S1**

**Molecular weight and composition of polymer library**

| Polymer | PEG (Da) | DMAEMA-co-BMA (Da) by GPC | DMAEMA-co-BMA (Da) by <sup>1</sup> H NMR | % BMA  | % DMAEMA | PDI   |
|---------|----------|---------------------------|------------------------------------------|--------|----------|-------|
| 0B      | 10,000   | 25,844                    | 19,299                                   | 0.0%   | 100.0%   | 1.09  |
| 30B     | 10,000   | 23,500                    | 22,383                                   | 29.6%  | 70.4%    | 1.073 |
| 40B     | 10,000   | 28,300                    | 24,203                                   | 40.2%  | 59.8%    | 1.252 |
| 50B     | 10,000   | 27,050                    | 25,643                                   | 50.2%  | 49.8%    | 1.188 |
| 60B     | 10,000   | 23,480                    | 24,856                                   | 58.1%  | 41.9%    | 1.203 |
| 100B    | 10,000   | 13,200                    | 20,235                                   | 100.0% | 0.0%     | 1.035 |
